# Supplementary material for: A novel plasma p-tau181 assay as a specific biomarker of tau pathology in Alzheimer's disease
Source: PubMed Central journal article supplement (PMC11375937; doi:10.1186/s40035-024-00439-4), 2024-09-03
Supplement: 40035_2024_439_MOESM2_ESM.pdf [file 40035_2024_439_MOESM2_ESM.pdf]

## Additional file 2

**Table S1.** Intra-assay precision ( $n = 20$ ).

|          | Sample 1:<br>1.56 pg/ml | Sample 2:<br>6.25 pg/ml | Sample 3:<br>25.0 pg/ml | Sample 4:<br>100 pg/ml |
|----------|-------------------------|-------------------------|-------------------------|------------------------|
| Mean AEB | 0.0189                  | 0.0580                  | 0.224                   | 0.872                  |
| SD       | 0.000817                | 0.000849                | 0.00656                 | 0.00940                |
| CV (%)   | 4.32                    | 1.46                    | 2.94                    | 1.08                   |

AEB, average enzyme per bead; SD, standard deviation; CV, coefficient of variation.

**Table S2.** Inter-assay precision for quality control samples ( $n = 25$ ).

|          | Sample 1<br>(plasma) | Sample 2<br>(plasma) | Sample 3<br>(rec) | Sample 4<br>(rec) | Sample 5<br>(rec) |
|----------|----------------------|----------------------|-------------------|-------------------|-------------------|
| Mean AEB | 0.00948              | 0.116                | 0.0592            | 0.128             | 0.882             |
| SD       | 0.000738             | 0.00650              | 0.00545           | 0.00676           | 0.0526            |
| CV (%)   | 7.78                 | 5.60                 | 9.19              | 5.30              | 5.96              |

AEB, average enzyme per bead; SD, standard deviation; CV, coefficient of variation.  
plasma, plasma sample containing mid-p-tau; rec, recombinant p-tau protein.

**Table S3.** Recovery rate (%Recovery) for each plasma sample in the spike recovery tests.

|          | Treatment         | Measured concentration (pg/ml) | CV (%) | Theoretical concentration of the spiked sample (pg/ml) | Recovery rate (%) |
|----------|-------------------|--------------------------------|--------|--------------------------------------------------------|-------------------|
| Sample 1 | Neat (0 pg spike) | 0.2675                         | 14.9   |                                                        |                   |
|          | 0.15 pg spike     | 0.3500                         | 7.94   | 0.4175                                                 | 119.3             |
|          | 0.3 pg spike      | 0.5130                         | 12.2   | 0.5675                                                 | 110.6             |
|          | 0.6 pg spike      | 0.8649                         | 7.73   | 0.8675                                                 | 100.3             |
| Sample 2 | Neat (0 pg spike) | 0.4516                         | 6.91   |                                                        |                   |
|          | 0.15 pg spike     | 0.6842                         | 3.63   | 0.6016                                                 | 87.9              |
|          | 0.3 pg spike      | 0.8909                         | 5.82   | 0.7516                                                 | 84.4              |
|          | 0.6 pg spike      | 1.101                          | 7.44   | 1.0516                                                 | 95.6              |

CV, coefficient of variation.

**Table S4.** An additional study of intra-assay reproducibility (%CV) by using the data on duplicated measurement of internal quality controls when the levels of plasma mid-p-tau181 were measured in the participants

|                     | Day 1 | Day 2 | Day 3 | Day 4 | Day 5 |
|---------------------|-------|-------|-------|-------|-------|
| IQC 1 (recombinant) | 4.86  | 2.27  | 0.03  | 0.92  | 4.38  |
| IQC 2 (recombinant) | 0.75  | 2.82  | 0.88  | 3.40  | 1.48  |
| IQC 3 (plasma)      | 4.31  | 14.89 | 6.25  | 6.56  | 1.48  |
| IQC 4 (plasma)      | 4.38  | 7.57  | 3.15  | 2.19  | 0.94  |

IQC, internal quality controls.

**Table S5.** An additional study of inter-assay reproducibility (%CV) by using the data on repeated measurement of internal quality controls when the levels of plasma mid-p-tau181 were measured in the participants

|      | IQC 1   | IQC 2   | IQC 3   | IQC 4   |
|------|---------|---------|---------|---------|
|      | 0.1172  | 0.8772  | 0.0139  | 0.0150  |
|      | 0.1256  | 0.8679  | 0.0147  | 0.0141  |
|      | 0.1205  | 0.8744  | 0.0158  | 0.0157  |
|      | 0.1167  | 0.8403  | 0.0128  | 0.0141  |
|      | 0.1341  | 0.9311  | 0.0126  | 0.0126  |
|      | 0.1341  | 0.9429  | 0.0115  | 0.0120  |
|      | 0.1214  | 0.7975  | 0.0130  | 0.0129  |
|      | 0.1198  | 0.8368  | 0.0119  | 0.0125  |
|      | 0.1230  | 0.8568  | 0.0127  | 0.0126  |
|      | 0.1309  | 0.8391  | 0.0129  | 0.0124  |
| Mean | 0.1243  | 0.8664  | 0.0132  | 0.0134  |
| SD   | 0.00657 | 0.04393 | 0.00130 | 0.00124 |
| CV%  | 5.28    | 5.07    | 9.90    | 9.27    |

IQC, internal quality controls.

**Table S6.** Demographic and blood biomarker data of the participants.

|                         | CN           | AD           | PSP           | FTLD         |
|-------------------------|--------------|--------------|---------------|--------------|
| Demographics            |              |              |               |              |
| Number                  | 40           | 48           | 50            | 26           |
| Age                     | 66.0 (10.4)  | 69.3 (11.4)  | 71.2 (7.5)    | 65.0 (11.4)  |
| Gender<br>(male/female) | 21/19        | 27/21        | 21/29         | 18/8         |
| Years of schooling      | 14.8 (1.6)   | 13.9 (2.2)   | 13.6 (2.6)    | 14.0 (2.8)   |
| MMSE                    | 29.3 (1.0) † | 21.9 (4.1) * | 24.8 (5.8) *† | 23.8 (6.1) * |
| FAB                     | 16.7 (1.2) † | 13.0 (3.0) * | 12.0 (3.6) *  | 11.0 (4.8) * |
| CDR (0.5/1/2/3)         | N/A          | 23/20/4/1    | N/A           | N/A          |
| PSPRS                   | N/A          | N/A          | 38.1 (18.2)   | N/A          |
| Blood biomarkers        |              |              |               |              |

|                      |                            |                            |                            |                            |
|----------------------|----------------------------|----------------------------|----------------------------|----------------------------|
| A $\beta$ 42/40      | 0.093 (0.020) <sup>†</sup> | 0.067 (0.020) <sup>†</sup> | 0.096 (0.048) <sup>†</sup> | 0.089 (0.022) <sup>†</sup> |
| N-p-tau181 (pg/ml)   | 1.82 (0.79) <sup>†</sup>   | 4.07 (1.52) <sup>*</sup>   | 2.27 (1.06) <sup>†</sup>   | 2.25 (1.25) <sup>†</sup>   |
| mid-p-tau181 (pg/ml) | 0.83 (0.65) <sup>†</sup>   | 2.30 (1.31) <sup>*</sup>   | 1.56 (0.91) <sup>*</sup>   | 0.96 (0.63) <sup>†</sup>   |
| NfL (pg/ml)          | 19.5 (12.5) <sup>†‡</sup>  | 33.2 (21.3) <sup>*‡</sup>  | 58.3 (39.7) <sup>*†</sup>  | 51.8 (39.3) <sup>*</sup>   |

This table summarizes the demographic information of the participants. All participants ( $n = 164$ ) underwent neuropsychological assessment, simultaneous amyloid and tau PET imaging, and blood sampling on the day of the PET examination. CN individuals exhibiting negative results on amyloid and tau PET imaging were designated into the CN cohort. Patients with MCI and AD who had positive amyloid PET findings were categorized into the AD continuum group (dubbed AD group). Furthermore, subjects with PSP and other FTLD who had negative amyloid PET findings were classified into the PSP and FTLD cohorts, respectively. No significant differences in age, years of schooling, and gender were observed among the groups. Notably, 90% of the AD group comprised subjects with early-stage AD who had a CDR score of 0.5 or 1 accounted. CN, cognitively normal; AD, Alzheimer's disease; PSP, progressive supranuclear palsy; FTLD, frontotemporal degeneration; MMSE, Mini-Mental State Examination; FAB, Frontal Assessment Battery; CDR, Clinical Dementia Rating scale; PSPRS, progressive supranuclear palsy rating scale; N/A, not applicable; A $\beta$ , amyloid beta; N-p-tau181, phosphorylated tau181 measured using the commercial kit directed to the C-terminally truncated N-terminal fragment of p-tau (Simoa pTau-181 V2.1 Assay, Quanterix); mid-p-tau181, phosphorylated tau181 measured using the originally developed immunoassay directed to both the N- and C-terminally truncated p-tau181 fragments; NfL, neurofilament light chain.

Values are presented as mean  $\pm$  standard deviation.

<sup>\*</sup>, Significant difference between CN, <sup>†</sup>, between AD, <sup>‡</sup>, between PSP,  $P < 0.05$  (corrected by Dunn's multiple comparisons).

**Table S7.** Differences in AIC values for regression analyses of p-tau levels and tau PET parameters

|              |              | Tau PET SUVRs |            |              |            |
|--------------|--------------|---------------|------------|--------------|------------|
|              | AD tau score | Temporal meta | Braak I/II | Braak III/IV | Braak V/VI |
| Mid-p-tau181 | 1.24         | 1.12          | -2.42      | 2.11         | 1.98       |
| N-p-tau181   | -3.12        | -18.15        | 0.047      | -12.57       | -7.99      |

The values represent the differences in AIC between linear and nonlinear regression analyses. Positive values indicate that the linear regression model is preferred, while negative values indicate that the nonlinear regression model is more suitable.

**Table S8.** Multiple linear regression analysis of p-tau levels with amyloid and tau PET metrics

|                             | Beta coefficient | Standard error | Adjusted $R^2$ | $P$ -value |
|-----------------------------|------------------|----------------|----------------|------------|
| mid-p-tau181                |                  |                |                |            |
| Amyloid PET (Centiloid)     | 0.258            | 0.115          | 0.450          | 0.056      |
| Tau PET (Temporal meta-ROI) | 0.472            | 0.115          |                | <0.0001    |
| N-p-tau181                  |                  |                |                |            |
| Amyloid PET (Centiloid)     | 0.399            | 0.118          | 0.420          | 0.002      |
| Tau PET (Temporal meta-ROI) | 0.311            | 0.118          |                | 0.020      |

**Table S9.** Amyloid/Tau PET status of cognitively normal individuals and AD continuum patients assessed by semi-quantitative approaches

| Quantitative approach        | CN              |                 | AD              |                 |
|------------------------------|-----------------|-----------------|-----------------|-----------------|
|                              | Amyloid/Tau (-) | Amyloid/Tau (+) | Amyloid/Tau (-) | Amyloid/Tau (+) |
| Centiloid (Amyloid)          | 40              | 0               | 3               | 45              |
| Braak staging (Tau)          | 35              | 5               | 3               | 45              |
| Temporal meta-ROI SUVR (Tau) | 37              | 3               | 7               | 41              |
| AD tau score (Tau)           | 40              | 0               | 2               | 35              |

The cut-off values of Centiloid, Temporal meta-ROI SUVR and AD tau score were 24, 1.105 and 0.1986, respectively. AD tau scores were exclusively computed for cases that underwent imaging with the mCT PET scanner.

**Table S10.** Performance of mid-p-tau 181 and N-p-tau181 assays in discriminating amyloid/tau PET status in the CN and AD continuum subjects

|                     | Sensitivity (%) | Specificity (%) | Cutoff value (pg/ml) | AUC   |
|---------------------|-----------------|-----------------|----------------------|-------|
| <b>mid-p-tau181</b> |                 |                 |                      |       |
| Centiloid           | 95.4            | 60.5            | 0.749                | 0.845 |
| Braak staging       | 62.8            | 92.5            | 1.76                 | 0.859 |
| Temporal meta SUVR  | 71.8            | 88.6            | 1.69                 | 0.855 |
| AD tau score        | 70.5            | 88.1            | 1.62                 | 0.870 |
| <b>N-p-tau181</b>   |                 |                 |                      |       |
| Centiloid           | 91.1            | 76.7            | 2.20                 | 0.890 |
| Braak staging       | 91.2            | 76.3            | 2.21                 | 0.903 |
| Temporal meta SUVR  | 77.3            | 95.5            | 3.19                 | 0.910 |
| AD tau score        | 91.4            | 78.6            | 2.20                 | 0.912 |

All parameters were estimated from receiver operating characteristic curve analyses. We set each cutoff value according to Youden index obtained in the respective receiver operating characteristic analyses.

SUVR, standardized uptake value ratio; AUC, area under the receiver operating characteristic curve.
